# Supplementary material
Source: PubMed Central journal article supplement (PMC1265859)
Supplement: JCI0524792sd.pdf [file JCI0524792sd.pdf]

## Supplementary Figure 1

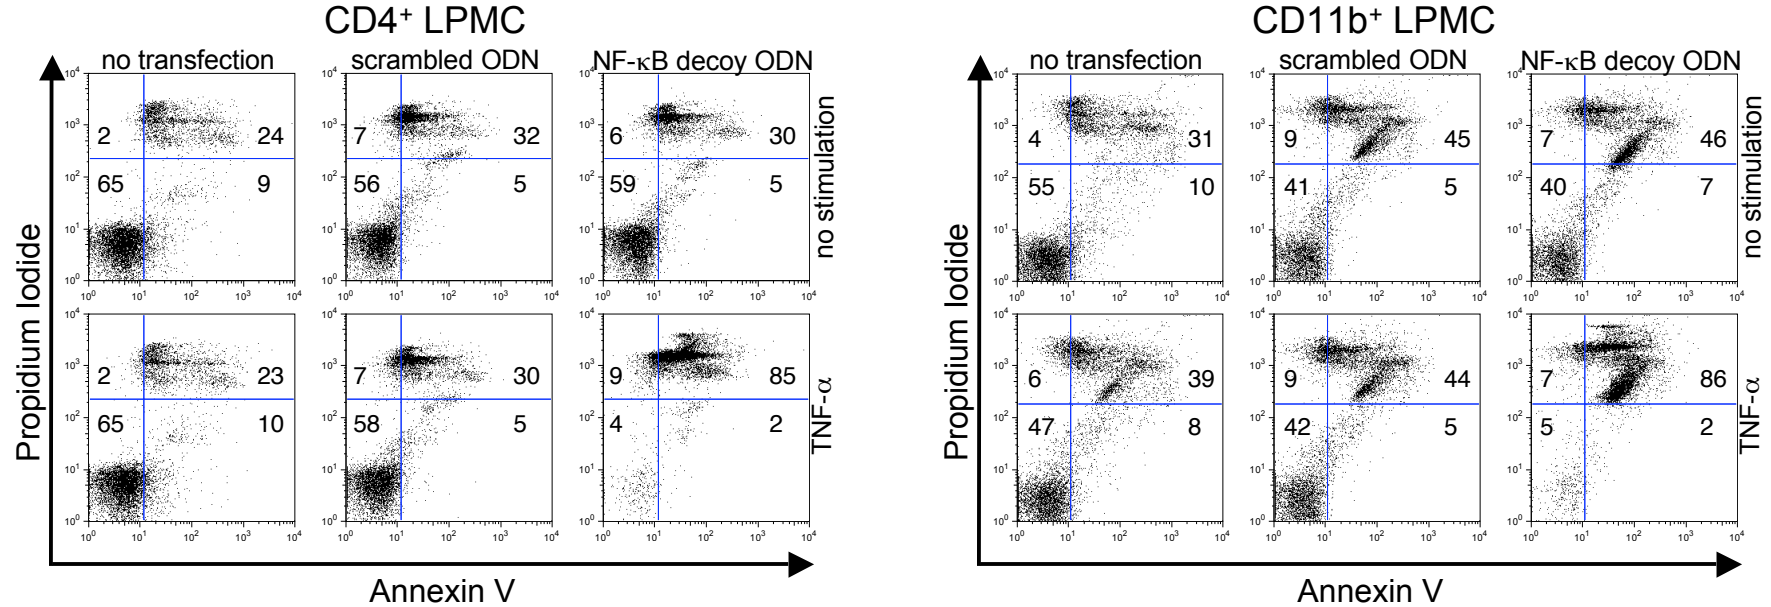

Supplementary Figure 1

TNF- $\alpha$  stimulation leads to apoptosis of NF- $\kappa$ B decoy ODN-transfected CD4<sup>+</sup> and CD11b<sup>+</sup> colonic LPMC *in vitro*. Colonic LPMC were separated into CD4<sup>+</sup> and CD11b<sup>+</sup> subpopulations by antibody-coated magnetic beads. The cells thus obtained were transfected with NF- $\kappa$ B decoy ODN or scrambled ODN or were left untransfected and then cultured with TNF- $\alpha$  for 24h. Apoptosis of transfected and untransfected CD4<sup>+</sup> and CD11b<sup>+</sup> LPMC was determined by Annexin V and propidium iodide staining at the end of the culture period.
